# Supplementary material
Source: PubMed Central journal article supplement (PMC3400016)
Supplement: emboj2012165s6.pdf [file emboj2012165s6.pdf]

..FUJISAFETY)...

2. 2nd Analysis

Scanned

0.5 2 5 15 30  
-----  
EVAL + Sgema
