# Supplementary material
Source: PubMed Central journal article supplement (PMC3400016)

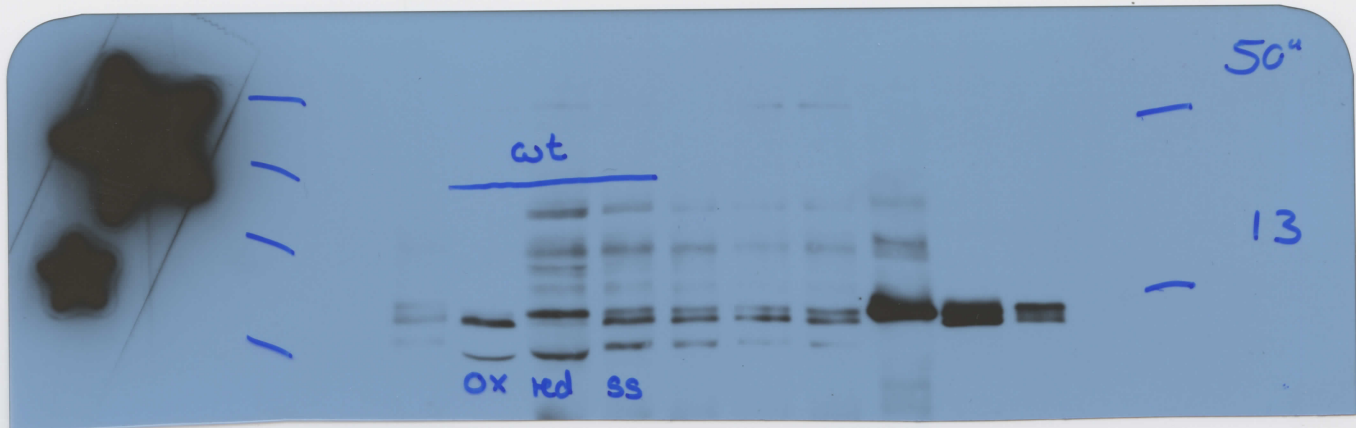

Supplement: emboj2012165s2.pdf [file emboj2012165s2.pdf]

H4K16

NET1

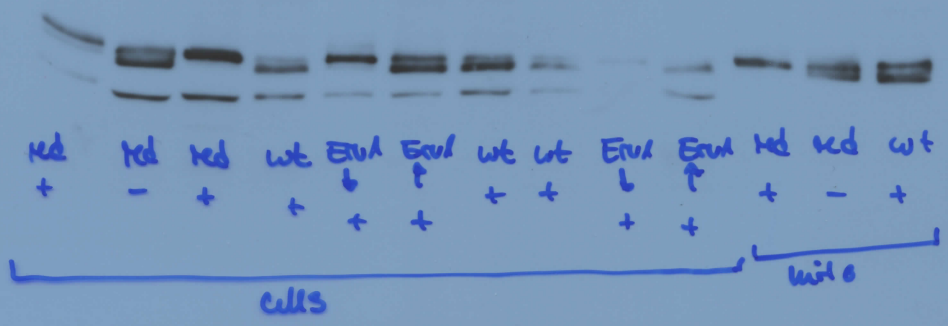

Supplement: emboj2012165s3.pdf [file emboj2012165s3.pdf]

••FUJIFILM(SAFETY)••

••FUJIFILM(SAFETY)••

is

—  
—  
—

+ - + - + - O<sub>2</sub>  
|-----| |-----| |-----|  
wt Δrip1 ΔCor1b

—  
μg20

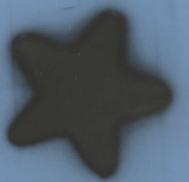

Supplement: emboj2012165s4.pdf [file emboj2012165s4.pdf]

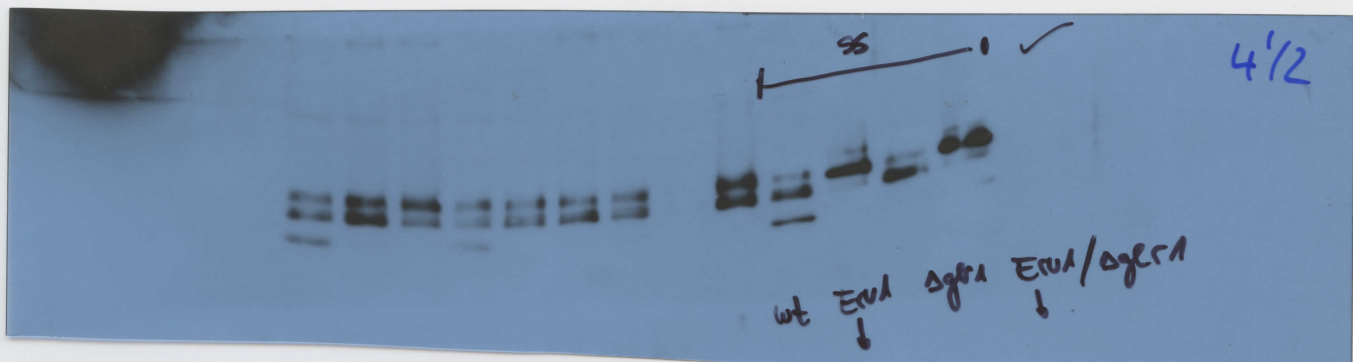

Supplement: emboj2012165s5.pdf [file emboj2012165s5.pdf]
